# Supplementary material
Source: PubMed Central journal article supplement (PMC3346444)
Supplement: supp_78.9.3256_AEM-AEM06752-11-s01.pdf [file supp_78.9.3256_AEM-AEM06752-11-s01.pdf]

Table S1: List of strains used in this study.

| strain                            | Source        | region          | Provided by                                                | Reference  |
|-----------------------------------|---------------|-----------------|------------------------------------------------------------|------------|
| <i>Saccharomyces kudriavzevii</i> |               |                 |                                                            |            |
| ARD6_1                            | Oak bark      | Ardèche, France | UMR SVQV, INRA Colmar -France                              | This study |
| ARD81_1                           | Oak bark      | Ardèche, France | UMR SVQV, INRA Colmar -France                              | This study |
| ARD81_2                           | Oak bark      | Ardèche, France | UMR SVQV, INRA Colmar -France                              | This study |
| ARD81_3                           | Oak bark      | Ardèche, France | UMR SVQV, INRA Colmar -France                              | This study |
| ARD81_4                           | Oak bark      | Ardèche, France | UMR SVQV, INRA Colmar -France                              | This study |
| ARD81_7                           | Oak bark      | Ardèche, France | UMR SVQV, INRA Colmar -France                              | This study |
| ARD81_8                           | Oak bark      | Ardèche, France | UMR SVQV, INRA Colmar -France                              | This study |
| ARD82_10                          | Oak bark      | Ardèche, France | UMR SVQV, INRA Colmar -France                              | This study |
| ARD82_2                           | Oak bark      | Ardèche, France | UMR SVQV, INRA Colmar -France                              | This study |
| ARD82_6                           | Oak bark      | Ardèche, France | UMR SVQV, INRA Colmar -France                              | This study |
| ARD83_10                          | Oak bark      | Ardèche, France | UMR SVQV, INRA Colmar -France                              | This study |
| ARD83_3                           | Oak bark      | Ardèche, France | UMR SVQV, INRA Colmar -France                              | This study |
| ARD83_4                           | Oak bark      | Ardèche, France | UMR SVQV, INRA Colmar -France                              | This study |
| ARD84_1                           | Oak bark      | Ardèche, France | UMR SVQV, INRA Colmar -France                              | This study |
| ARD84_10                          | Oak bark      | Ardèche, France | UMR SVQV, INRA Colmar -France                              | This study |
| ARD84_2                           | Oak bark      | Ardèche, France | UMR SVQV, INRA Colmar -France                              | This study |
| ARD84_3                           | Oak bark      | Ardèche, France | UMR SVQV, INRA Colmar -France                              | This study |
| ARD84_4                           | Oak bark      | Ardèche, France | UMR SVQV, INRA Colmar -France                              | This study |
| ARD84_5                           | Oak bark      | Ardèche, France | UMR SVQV, INRA Colmar -France                              | This study |
| ARD84_8                           | Oak bark      | Ardèche, France | UMR SVQV, INRA Colmar -France                              | This study |
| Z542                              | Oak bark      | Portugal        | CREM, DCV, Universidade Nova de Lisboa, Caparica, Portugal | 49         |
| Z594                              | Oak bark      | Portugal        | CREM, DCV, Universidade Nova de Lisboa, Caparica, Portugal | 49         |
| Z629                              | Oak bark      | Portugal        | CREM, DCV, Universidade Nova de Lisboa, Caparica, Portugal | 49         |
| IFO1802                           | forest litter | Japan           | UMR1319 Micalis, INRA AgroParisTech, France                |            |

Table S1 (continued)

*Saccharomyces cerevisiae* / *Saccharomyces kudriavzevii* hybrids

|                    |      |                |                                                                  |            |
|--------------------|------|----------------|------------------------------------------------------------------|------------|
| CHIMAY             | beer | Belgium        | UMRSVQV INRA, Colmar – France                                    | 30         |
| 1T1a               | wine | Alsace, France | UMR SVQV, INRA Colmar -France                                    | 30         |
| Eg1                | wine | Alsace, France | UMR SVQV, INRA Colmar -France                                    | 30         |
| Eg12               | wine | Alsace, France | UMR SVQV, INRA Colmar -France                                    | 30         |
| Eg17               | wine | Alsace, France | UMR SVQV, INRA Colmar -France                                    | 30         |
| Eg2                | wine | Alsace, France | UMR SVQV, INRA Colmar -France                                    | 30         |
| Eg24               | wine | Alsace, France | UMR SVQV, INRA Colmar -France                                    | 30         |
| Eg6                | wine | Alsace, France | UMR SVQV, INRA Colmar -France                                    | 30         |
| Eg8                | wine | Alsace, France | UMR SVQV, INRA Colmar -France                                    | 30         |
| Clib987 -<br>E11D4 | wine | Alsace, France | UMR SVQV, INRA Colmar -France                                    | this study |
| GEI10              | Wine | Germany        | Department Microbiology and Biochemistry,<br>Geisenheim –Germany | 30         |
| GEI12              | Wine | Germany        | Department Microbiology and Biochemistry,<br>Geisenheim –Germany | 30         |
| GEI5               | Wine | Germany        | Department Microbiology and Biochemistry,<br>Geisenheim –Germany | 30         |
| GEI7               | Wine | Germany        | Department Microbiology and Biochemistry,<br>Geisenheim –Germany | 30         |
| H10418             | wine | Hungary        | University of Debrecen, Debrecen- Hungary                        | 30         |
| H10422             | wine | Hungary        | University of Debrecen, Debrecen, Hungary                        | 30         |
| H10423             | wine | Hungary        | University of Debrecen, Debrecen, Hungary                        | 30         |
| SIHAD4             | wine | Germany        | Beco, Germany                                                    | 30         |
| UCD505             | wine | USA            | UC Davis, California U.S.A.                                      | 30         |
| UCD580             | wine | USA            | UC Davis, California U.S.A.                                      | 30         |
| UHA1               | wine | Alsace, France | LBE Université de Haute Alsace, Colmar -<br>France               | 30         |
| UHA2               | wine | Alsace, France | LBE Université de Haute Alsace, Colmar -<br>France               | 30         |
| UHA3               | wine | Alsace, France | LBE Université de Haute Alsace, Colmar -<br>France               | 30         |

Table S1 (continued)

|                                        |               |                         |                                                                                          |    |
|----------------------------------------|---------------|-------------------------|------------------------------------------------------------------------------------------|----|
| UHA4                                   | wine          | Alsace, France          | LBE Université de Haute Alsace, Colmar - France                                          | 30 |
| UHA5                                   | wine          | Alsace, France          | LBE Université de Haute Alsace, Colmar - France                                          | 30 |
| UHA6                                   | wine          | Alsace, France          | LBE Université de Haute Alsace, Colmar - France                                          | 30 |
| VIN7                                   | wine          | Alsace, France?         | Anchor yeast, South Africa                                                               | 7  |
| HWD77                                  | wine          | Wadenswill, Switzerland | Research Station for Fruit-Growing, Viticulture and Horticulture Wadenswill, Switzerland | 18 |
| HWD126                                 | wine          | Wadenswill, Switzerland | Research Station for Fruit-Growing, Viticulture and Horticulture Wadenswill, Switzerland | 18 |
| HWD205                                 | wine          | Wadenswill, Switzerland | Research Station for Fruit-Growing, Viticulture and Horticulture Wadenswill, Switzerland | 18 |
| HWD231                                 | wine          | Wadenswill, Switzerland | Research Station for Fruit-Growing, Viticulture and Horticulture Wadenswill, Switzerland | 18 |
| HWD278                                 | wine          | Wadenswill, Switzerland | Research Station for Fruit-Growing, Viticulture and Horticulture Wadenswill, Switzerland | 18 |
| HWD319                                 | wine          | Wadenswill, Switzerland | Research Station for Fruit-Growing, Viticulture and Horticulture Wadenswill, Switzerland | 18 |
| HWD441                                 | wine          | Wadenswill, Switzerland | Research Station for Fruit-Growing, Viticulture and Horticulture Wadenswill, Switzerland | 18 |
| Uvaferm CEG                            | wine          | France (Champagne)      | USAMV Bucarest, Romania                                                                  | 50 |
| Assmannshausen (LallASH)               | wine          | Germany                 | Lallemand Inc, Montreal, Canada                                                          | 7  |
| <b><i>Saccharomyces cerevisiae</i></b> |               |                         |                                                                                          |    |
| Clib960 - 07B1a                        | wine          | Alsace, France          | UMR SVQV, INRA Colmar -France                                                            | 30 |
| 10402H                                 | wine          | Nantes, France          | University of Debrecen, Debrecen, Hungary                                                | 30 |
| 10404H                                 | wine          | Nantes, France          | University of Debrecen, Debrecen, Hungary                                                | 30 |
| 105FCA                                 | Cantal Cheese | France                  | INRA, Station de Recherche Fromagère, Aurillac, France                                   | 30 |
| 11FCA                                  | Cantal Cheese | France                  | INRA, Station de Recherche Fromagère, Aurillac, France                                   | 30 |

Table S1 (continued)

|                     |                  |                   |                                                        |    |
|---------------------|------------------|-------------------|--------------------------------------------------------|----|
| 16FCA               | Cantal Cheese    | France            | INRA, Station de Recherche Fromagère, Aurillac, France | 30 |
| 1cPenciu            | wine             | Romania,          | University of Bucarest, Romania                        | 30 |
| Clib962 - 1M1a      | wine             | Alsace, France    | UMR SVQV, INRA Colmar -France                          | 30 |
| Clib963 - 1M1b      | wine             | Alsace, France    | UMR SVQV, INRA Colmar -France                          | 30 |
| Clib964 -1M8        | wine             | Alsace, France    | UMR SVQV, INRA Colmar -France                          | 30 |
| Clib965 - 1n1d      | wine             | Alsace, France    | UMR SVQV, INRA Colmar -France                          | 30 |
| Clib966 - 1T1A      | wine             | Alsace, France    | UMR SVQV, INRA Colmar -France                          | 30 |
| Clib967 - 1W12      | wine             | Alsace, France    | UMR SVQV, INRA Colmar -France                          | 30 |
| 273614X             | Clinical isolate | RVI, Newcaslte UK | SCRIP                                                  | 34 |
| S288C (=ATCC 26108) | laboratory       | Laboratory strain | UMR SVQV, INRA Colmar -France                          | 30 |
| Clib968 - 2B1a      | wine             | Alsace, France    | UMR SVQV, INRA Colmar -France                          | 30 |
| Clib969 - 2M4/93    | wine             | Alsace, France    | UMR SVQV, INRA Colmar -France                          | 30 |
| 322134S             | Clinical isolate | RVI, Newcaslte UK | SCRIP                                                  | 34 |
| 378604X             | Clinical isolate | RVI, Newcaslte UK | SCRIP                                                  | 34 |
| Clib293 - 522Davis  | wine             | Burgundy, France  | CIRM-Levures, INRA, Thiverval-Grignon, France          | 30 |
| 52FCA               | Cantal Cheese    | France            | INRA, Station de Recherche Fromagère, Aurillac, France | 30 |
| Vitilevure 58W3     | wine             | Alsace, France    | Sofralab, Epernay, France                              | 30 |
| 72FCA               | Cantal Cheese    | France            | INRA, Station de Recherche Fromagère, Aurillac, France | 30 |
| 74FCA               | Cantal Cheese    | France            | INRA, Station de Recherche Fromagère, Aurillac, France | 30 |

Table S1 (continued)

|                  |               |                |                                                                                 |            |
|------------------|---------------|----------------|---------------------------------------------------------------------------------|------------|
| 84FCA            | Cantal Cheese | France         | INRA, Station de Recherche Fromagère, Aurillac, France                          | 30         |
| 99FCA            | Cantal Cheese | France         | INRA, Station de Recherche Fromagère, Aurillac, France                          | 30         |
| A4C19            | Grapes        | South Africa   | Institute for Wine Biotechnology, Stellenbosch University, South Africa         | 30         |
| Anchor NT50      | wine          | South Africa   | Anchor yeast, South Africa                                                      |            |
| AWAMORI          | Shochu        | Japan          | National Research Institute of Brewing (NRIB), Japan                            | 30         |
| BV2-5.9          | Grapes        | South Africa   | Institute for Wine Biotechnology, Stellenbosch University, South Africa         | 30         |
| Clib319 - Cappa1 | Baker strain  | France         | CIRM-Levures, INRA, Thiverval-Grignon, France                                   | 30         |
| CAV21jura        |               |                | Institut Jules Guyot, Dijon, France                                             | 30         |
| CBS1171-Clib227  | beer          | Netherlands    | CIRM-Levures, INRA, Thiverval-Grignon, France                                   | 30         |
| CLIB 408         | rice wine     | Asia           | CIRM-Levures, INRA, Thiverval-Grignon, France                                   | 30         |
| CLIB 409         | rice wine     | Asia           | CIRM-Levures, INRA, Thiverval-Grignon, France                                   | 30         |
| CLIB 411         | rice wine     | Asia           | CIRM-Levures, INRA, Thiverval-Grignon, France                                   | 30         |
| CLIB 413         | rice wine     | Asia           | CIRM-Levures, INRA, Thiverval-Grignon, France                                   | 30         |
| CLIB 413         | rice wine     | Asia           | CIRM-Levures, INRA, Thiverval-Grignon, France                                   | 30         |
| COG100           | wine          | Cognac, France | BIVC, Cognac - France                                                           | 30         |
| COG102           | wine          | Cognac, France | BIVC, Cognac - France                                                           | 30         |
| COG24            | wine          | Cognac, France | BIVC, Cognac - France                                                           | 30         |
| D50              | Wine          | Die, France    | UMR SVQV, INRA Colmar -France                                                   | this study |
| DAB110           | wine          | Tuscani, Italy | Dipartimento di Biotecnologie Agrarie, Universita degli Studi di Firenze, Italy | 30         |
| DAB114           | wine          | Tuscani, Italy | Dipartimento di Biotecnologie Agrarie, Universita degli Studi di Firenze, Italy | 30         |
| DAB12            | wine          | Tuscani, Italy | Dipartimento di Biotecnologie Agrarie, Universita degli Studi di Firenze, Italy | 30         |

Table S1 (continued)

|                      |            |                   |                                                                                     |    |
|----------------------|------------|-------------------|-------------------------------------------------------------------------------------|----|
| DAB124               | wine       | Tuscani, Italy    | Dipartimento di Biotechnologie Agrarie,<br>Universita degli Studi di Firenze, Italy | 30 |
| DBVPG1106            | wine       | Australia         | SCRP                                                                                | 30 |
| DBVPG1373            | Soil       | Netherlands       | SCRP                                                                                | 34 |
| DBVPG1788            | Soil       | Finland           | SCRP                                                                                | 34 |
| DBVPG1853            | White Tecc | Ethiopia          | SCRP                                                                                | 34 |
| DBVPG6040            | Soil       | Netherlands       | SCRP                                                                                | 34 |
| DBVPG6044            | Bili wine  | West Africa       | SCRP                                                                                | 34 |
| DBVPG6765            | Unknown    | Unknown           | SCRP                                                                                | 34 |
| EDV493               | rum        | French Indies     | URTPV INRA Antilles Guadeloupe - France                                             | 30 |
| Eg25                 | wine       | Alsace, France    | UMR SVQV, INRA Colmar -France                                                       | 30 |
| Zymaflore<br>F10     | wine       | Bordeaux          | Laffort,Bordeaux, France                                                            | 30 |
| f1100 (= ATCC 28383) | laboratory | Laboratory strain | UMR SVQV, INRA Colmar -France                                                       | 30 |
| f1200 (=ATCC 32119), | laboratory | Laboratory strain | UMR SVQV, INRA Colmar -France                                                       | 30 |
| FY10                 | laboratory | Laboratory strain | Institute for Wine Biotechnology, Stellenbosch University, South Africa             | 30 |
| FY1679               | laboratory | Laboratory strain | UMR SVQV, INRA Colmar -France                                                       | 30 |
| galIII               | wine       | Galicia, Spain    | Estacio'n de Viticultura e Enoloxi'a de Galicia, Spain                              | 30 |
| galXV                | wine       | Galicia, Spain    | Estacio'n de Viticultura e Enoloxi'a de Galicia, Spain                              | 30 |
| galXVI               | wine       | Galicia, Spain    | Estacio'n de Viticultura e Enoloxi'a de Galicia, Spain                              | 30 |
| galXVIII             | wine       | Galicia, Spain    | Estacio'n de Viticultura e Enoloxi'a de Galicia, Spain                              | 30 |
| GEI11                | Wine       | Germany           | Department Microbiology and Biochemistry, Geisenheim –Germany                       | 30 |
| H10419               | wine       | Hungary           | University of Debrecen, Debrecen, Hungary                                           | 30 |
| HAE                  | beer       | Belgium           | UMRSVQV INRA, Colmar – France                                                       | 30 |
| HS015                | Distillery | China             | CIRM-Levures, INRA, Thiverval-Grignon, France                                       | 30 |

Table S1 (continued)

|        |            |                      |                                                      |    |
|--------|------------|----------------------|------------------------------------------------------|----|
| HS131  | Distillery | China                | CIRM-Levures, INRA, Thiverval-Grignon, France        | 30 |
| IR1452 | wine       | Rhone valley, France | UMRSVQV INRA, Colmar – France                        | 30 |
| IR1993 | wine       | Rhone valley, France | UMRSVQV INRA, Colmar – France                        | 30 |
| IR2050 | wine       | Rhone valley, France | UMRSVQV INRA, Colmar – France                        | 30 |
| IR2194 | wine       | Rhone valley, France | UMRSVQV INRA, Colmar – France                        | 30 |
| K1     | Sake       | Japan                | National Research Institute of Brewing (NRIB), Japan | 30 |
| K11    | Sake       | Japan                | National Research Institute of Brewing (NRIB), Japan | 30 |
| K2     | Sake       | Japan                | National Research Institute of Brewing (NRIB), Japan | 30 |
| K3     | Sake       | Japan                | National Research Institute of Brewing (NRIB), Japan | 30 |
| K4     | Sake       | Japan                | National Research Institute of Brewing (NRIB), Japan | 30 |
| K5     | Sake       | Japan                | National Research Institute of Brewing (NRIB), Japan | 30 |
| K6     | Sake       | Japan                | National Research Institute of Brewing (NRIB), Japan | 30 |
| K7     | Sake       | Japan                | National Research Institute of Brewing (NRIB), Japan | 30 |
| K9     | Sake       | Japan                | National Research Institute of Brewing (NRIB), Japan | 30 |
| KroA10 | beer       | France               | TEPRAL, Strasbourg, France.                          | 30 |
| KroA11 | beer       | France               | TEPRAL, Strasbourg, France.                          | 30 |
| L-1374 | wine       | Chile                | SCRP                                                 | 30 |
| L-1528 | wine       | Chile                | SCRP                                                 | 30 |
| L1414  | wine       | Beaujolais France    | Sicarex Beaujolais; Villefranche sur Saône - France  | 30 |
| L1515  | wine       | Beaujolais, France   | Sicarex Beaujolais; Villefranche sur Saône - France  | 30 |

Table S1 (continued)

|                     |                                      |                         |                                                                                                                      |    |
|---------------------|--------------------------------------|-------------------------|----------------------------------------------------------------------------------------------------------------------|----|
| L2056               | wine                                 | Rhône valley,<br>France | Inter Rhône, Avignon, France                                                                                         | 30 |
| L2226               | wine                                 | Rhône valley,<br>France | Inter Rhône, Avignon, France                                                                                         | 30 |
| Lalvin BM45         | wine                                 | Bordeaux,<br>France     | Lallemand Inc, Montreal, Quebec                                                                                      | 30 |
| Levuline<br>Primeur | wine                                 | France                  | Oenofrance                                                                                                           | 30 |
| LR-jura             | wine                                 | Jura, France            | Institut Jules Guyot, Université de Bourgogne,<br>Dijon, France                                                      | 30 |
| MAA51               | wine                                 | Jura, France            | UMR SVQV, INRA Colmar -France                                                                                        | 30 |
| MCN10A              | wine                                 | Montpellier,<br>France  | INRA, UMR1083 SPO, Montpellier - France                                                                              | 30 |
| MCN10B              | wine                                 | Montpellier,<br>France  | INRA, UMR1083 SPO, Montpellier - France                                                                              | 30 |
| MCN10C              | wine                                 | Montpellier,<br>France  | INRA, UMR1083 SPO, Montpellier - France                                                                              | 30 |
| MCN1B               | wine                                 | Montpellier,<br>France  | INRA, UMR1083 SPO, Montpellier - France                                                                              | 30 |
| MJ10                | wine                                 | Lebanon                 | CIRM, INRA INA PG, Grignon – France                                                                                  | 30 |
| MJ111               | wine                                 | Lebanon                 | CIRM, INRA INA PG, Grignon – France                                                                                  | 30 |
| MJ112               | wine                                 | Lebanon                 | CIRM, INRA INA PG, Grignon – France                                                                                  | 30 |
| MJ119               | wine                                 | Lebanon                 | CIRM, INRA INA PG, Grignon – France                                                                                  | 30 |
| MUCL42908           | Fermented<br>milk                    | Marocco                 | MUCL, Louvain, Belgium                                                                                               | 30 |
| MUCL42920           | Baker strain                         | Marocco                 | MUCL, Louvain, Belgium                                                                                               | 30 |
| NCYC110             | Ginger beer<br>from Z.<br>officinale | West Africa             | SCRP                                                                                                                 | 34 |
| npa21               | palm wine                            | Nigeria                 | Nigeria – Dept Biol. Sciences, Michael Okpara<br>University of Agriculture (DBS MOUA)<br>Umudike, Abia State Nigeria | 30 |
| npa31               | palm wine                            | Nigeria                 | Nigeria – Dept Biol. Sciences, Michael Okpara<br>University of Agriculture (DBS MOUA)<br>Umudike, Abia State Nigeria | 30 |
| npa5a1              | palm wine                            | Nigeria                 | Nigeria – Dept Biol. Sciences, Michael Okpara<br>University of Agriculture (DBS MOUA)<br>Umudike, Abia State Nigeria | 30 |



Table S1 (continued)

|                            |           |                  |                                                                                                                      |    |
|----------------------------|-----------|------------------|----------------------------------------------------------------------------------------------------------------------|----|
| npa5b1                     | palm wine | Nigeria          | Nigeria – Dept Biol. Sciences, Michael Okpara<br>University of Agriculture (DBS MOUA)<br>Umudike, Abia State Nigeria | 30 |
| npa5d1                     | palm wine | Nigeria          | Nigeria – Dept Biol. Sciences, Michael Okpara<br>University of Agriculture (DBS MOUA)<br>Umudike, Abia State Nigeria | 30 |
| npa5d2                     | palm wine | Nigeria          | Nigeria – Dept Biol. Sciences, Michael Okpara<br>University of Agriculture (DBS MOUA)<br>Umudike, Abia State Nigeria | 30 |
| npa61                      | palm wine | Nigeria          | Nigeria – Dept Biol. Sciences, Michael Okpara<br>University of Agriculture (DBS MOUA)<br>Umudike, Abia State Nigeria | 30 |
| npa62                      | palm wine | Nigeria          | Nigeria – Dept Biol. Sciences, Michael Okpara<br>University of Agriculture (DBS MOUA)<br>Umudike, Abia State Nigeria | 30 |
| npa71                      | palm wine | Nigeria          | Nigeria – Dept Biol. Sciences, Michael Okpara<br>University of Agriculture (DBS MOUA)<br>Umudike, Abia State Nigeria | 30 |
| npa72                      | palm wine | Nigeria          | Nigeria – Dept Biol. Sciences, Michael Okpara<br>University of Agriculture (DBS MOUA)<br>Umudike, Abia State Nigeria | 30 |
| NPCR 2-7                   | palm wine | Nigeria          | Nigeria – Dept Biol. Sciences, Michael Okpara<br>University of Agriculture (DBS MOUA)<br>Umudike, Abia State Nigeria | 30 |
| NPCR4-14                   | palm wine | Nigeria          | Nigeria – Dept Biol. Sciences, Michael Okpara<br>University of Agriculture (DBS MOUA)<br>Umudike, Abia State Nigeria | 30 |
| NPCR4-15                   | palm wine | Nigeria          | Nigeria – Dept Biol. Sciences, Michael Okpara<br>University of Agriculture (DBS MOUA)<br>Umudike, Abia State Nigeria | 30 |
| NPCR5-1                    | palm wine | Nigeria          | Nigeria – Dept Biol. Sciences, Michael Okpara<br>University of Agriculture (DBS MOUA)<br>Umudike, Abia State Nigeria | 30 |
| NPDR4-7                    | palm wine | Nigeria          | Nigeria – Dept Biol. Sciences, Michael Okpara<br>University of Agriculture (DBS MOUA)<br>Umudike, Abia State Nigeria | 30 |
| Oenoferm<br>Klosterneuburg | wine      | Austria          | Weinbau Institut Klosterneubourg, Austria                                                                            | 30 |
| P17                        | wine      | Taragonna, Spain | University of Tagagonna, Spain                                                                                       | 30 |
| P37                        | wine      | Taragonna, Spain | University of Tagagonna, Spain                                                                                       | 30 |

Table S1 (continued)

|               |                              |                     |                                                                  |    |
|---------------|------------------------------|---------------------|------------------------------------------------------------------|----|
| P54           | wine                         | Taragonna, Spain    | University of Tagagonna, Spain                                   | 30 |
| Pt154         | wine                         | Braga, Portugal     | Departamento de Biologia, Universidade do Minho, Braga, Portugal | 52 |
| Pt158         | wine                         | Braga, Portugal     | Departamento de Biologia, Universidade do Minho, Braga, Portugal | 52 |
| Pt241         | wine                         | Braga, Portugal     | Departamento de Biologia, Universidade do Minho, Braga, Portugal | 52 |
| Pt254         | wine                         | Braga, Portugal     | Departamento de Biologia, Universidade do Minho, Braga, Portugal | 52 |
| Pt259         | wine                         | Braga, Portugal     | Departamento de Biologia, Universidade do Minho, Braga, Portugal | 52 |
| Pt38          | wine                         | Braga, Portugal     | Departamento de Biologia, Universidade do Minho, Braga, Portugal | 52 |
| Pt74          | wine                         | Braga, Portugal     | Departamento de Biologia, Universidade do Minho, Braga, Portugal | 52 |
| Pt82          | wine                         | Braga, Portugal     | Departamento de Biologia, Universidade do Minho, Braga, Portugal | 52 |
| Pt95          | wine                         | Braga, Portugal     | Departamento de Biologia, Universidade do Minho, Braga, Portugal | 52 |
| SK1           | Soil                         | USA                 | SCRP                                                             | 34 |
| Zymaflore ST  | wine                         | Bordeaux,<br>France | Laffort,Bordeaux, France                                         | 30 |
| UCD505        | wine                         | USA                 | UC Davis, California United States.                              | 30 |
| UCD580        | wine                         | USA                 | UC Davis, California United States.                              | 30 |
| UCD916        | Beer                         | USA                 | UC Davis, California United States.                              | 30 |
| UWOPS03-461.4 | Nectar,<br>Bertam<br>palm    | Malaysia            | SCRP                                                             | 34 |
| UWOPS05-217.3 | Nectar,<br>Bertam<br>palm    | Malaysia            | SCRP                                                             | 34 |
| UWOPS05-227.2 | Trigona,<br>Bertam<br>palm   | Malaysia            | SCRP                                                             | 34 |
| UWOPS83-787.3 | Fruit,<br>Opuntia<br>stricta | Bahamas             | SCRP                                                             | 34 |

Table S1 (continued)

|                   |                                   |                      |                                                                           |                    |
|-------------------|-----------------------------------|----------------------|---------------------------------------------------------------------------|--------------------|
| UWOPS87-2421      | Cladode,<br>Opuntia<br>megacantha | Hawaii               | SCRP                                                                      | 34                 |
| Vitilevure<br>CSM | wine                              | Bordeaux,<br>France  | Sofralab, Epernay, France                                                 | 30                 |
| Vitilevure GY     | wine                              | France               | Sofralab, Epernay, France                                                 | 30                 |
| W303              | laboratory                        | Laboratory           | UMR SVQV, INRA Colmar -France                                             | 30                 |
| Y55               | wine                              | France               | SCRP                                                                      | 34                 |
| Y9                | Ragi                              | Japan                | SCRP                                                                      | 30                 |
| YA2               | Bread                             | Sicily, Italy        | UMR1319 Micalis, INRA AgroParisTech,<br>France                            | 30                 |
| YA3               | Bread                             | Sicily, Italy        | UMR1319 Micalis, INRA AgroParisTech,<br>France                            | 30                 |
| YA5               | Bread                             | Sicily, Italy        | UMR1319 Micalis, INRA AgroParisTech,<br>France                            | 30                 |
| YB1               | Bread                             | Sicily, Italy        | UMR1319 Micalis, INRA AgroParisTech,<br>France                            | 30                 |
| YHUM0271          | laboratory                        | Laboratory strain    | Department of Genetics, Philipps University<br>Marburg, Marburg - Germany | Dewald<br>van Dyka |
| YIIc17-E5         | wine                              | Sauternes,<br>France | SCRP                                                                      | 30                 |
| YJM789            | Clinical<br>isolate               | Texas, USA           | Duke University medical center, Durham                                    | 51                 |
| YJM975            | Clinical<br>isolate               | Bergamo, Italy       | SCRP                                                                      | 34                 |
| YJM978            | Clinical<br>isolate               | Bergamo, Italy       | SCRP                                                                      | 34                 |
| YJM981            | Clinical<br>isolate               | Bergamo, Italy       | SCRP                                                                      | 34                 |
| YPS128            | Oak                               | Pennsylvania,<br>USA | University of Chicago, USA                                                | 53                 |
| YPS133            | Oak                               | Pennsylvania,<br>USA | University of Chicago, USA                                                | 53                 |
| YPS134            | Oak                               | Pennsylvania,<br>USA | University of Chicago, USA                                                | 53                 |
| YPS139            | Oak                               | Pennsylvania,<br>USA | University of Chicago, USA                                                | 53                 |

Table S1 (continued)

|                  |              |                      |                                               |    |
|------------------|--------------|----------------------|-----------------------------------------------|----|
| YPS606           | Oak          | Pennsylvania,<br>USA | SCRP                                          | 34 |
| YS2              | Baker strain | Australia            | Saccharomyces cerevisiae resequencing project | 30 |
| YS4              | Baker strain | Netherlands          | SCRP                                          | 34 |
| YS9              | Baker strain | Singapore            | SCRP                                          | 34 |
| Zymaflore<br>VL1 | wine         | Bordeaux,<br>France  | Laffort,Bordeaux, France                      | 30 |
| Zymaflore<br>VL3 | wine         | Bordeaux,<br>France  | Laffort,Bordeaux, France                      | 30 |

Table S2: Primers used for PCR-RFLP analysis.

| Loci<br>(fw and rv primers) | Sequence                   |
|-----------------------------|----------------------------|
| YAL008wfw                   | AGCGTCGATGATTTTCAGGAA      |
| YAL008wrv                   | ACCGAATCAAGGTTGACTTGGT     |
| YBL021cfw                   | TCCCAAGGCAAATGCCAATAT      |
| YBL021crv                   | AGTCTTAGCGATAGATCGGT       |
| YCL014wfw                   | ATGTCATTGATTCGTTTGGAA      |
| YCL014wrv                   | GGCATCATGCTTATCTAAAAC      |
| YDL003cfw                   | CCATTA/T GCACAAATATGGCTTGC |
| YDL003crv                   | CAAGTGATAAAATATCGAAAAATCC  |
| YDR337fw                    | ATGTCGATHGTTGGAAGGAAT      |
| YDR337rv                    | AGTAGTATTTTTCAGGATTATC     |
| YEL061wfw                   | TGAATGCCAAGAGATACACAGT     |
| YEL061wrv                   | GTAGCGTTTTTCCTTGTTACCA     |
| YFR030wfw                   | ACCAATCACCATAACACTTCCATA   |
| YFR030wrv                   | TGTTTGGTAGTGGATGGAACGT     |
| YGL162wfw                   | AACGTAAACCGGAGTTGTCA       |
| YGL162wrv                   | TGCATGGTAAACAAGGTGTGAGCAA  |
| YHL038cfw                   | TGGCAAACATTGTTTCATGGTCTC   |
| YHL038crv                   | TCATCTTGCATAAACTTGTACAAGTT |
| YHR043cfw                   | GGGTAATTCTCGAGGATTTT       |
| YHR043crv                   | GTTGTTCAACCGCACGATC        |
| YIL013cfw                   | TACTTCCGCTACCAACAAC        |
| YIL013crv                   | TCCATCTGTGATGATAACTCAT     |
| YJL052wfw                   | TAGTAACCACACCACATTTTCA     |
| YJL052wrv                   | GGTCAACTTACCTTGCAATTC      |
| YJR139cfw                   | CGTTATCGGTGCCGGTGT         |
| YJR139crv                   | CTAAAGTCTTTGAGCAATCTTGAT   |

Table S2: (continued)

|           |                             |
|-----------|-----------------------------|
| YKL004wfw | CATGTCGCCATGCGAATATTC       |
| YKL004wrv | TCTACAAAATAATGGTGTGTCA      |
| YLR001cfw | GAAGCCGATAATCCTTCAAGGAGTAAC |
| YLR001rv  | TGATCTTTC/TCTGCAGTTTAGTT    |
| YMR001cfw | TGGATTTGCTCGCTGTTTCCA       |
| YMR001crv | TCCTCTGTTGATAACTGATAGGA     |
| YMR303wfw | TTATTTTCTACGAATCCAACGG      |
| YMR303wrv | TACCTTKATTGGAGACTTGAC       |
| YNL291cfw | TTCGCAAATAAGAATATTTTCCTT    |
| YNL291crv | TCTGCGTCACAGGATATTAACT      |
| YNR001cfw | AAGAAATCTCCGAAGTTCGCA       |
| YNR001crv | TAATCATCGATAGGGCTGTT        |
| YOL002cfw | CAAGCACGTTTCGCCTCATTCAT     |
| YOL002crv | TAGCAATCCCTAACCAAGGCCA      |
| YPL001fw  | TATGGGATAATGCTCTTCTTGA      |
| YPL001rv  | CCAGTTTTAAAGATTTTCGGCTTGA   |
| YPR140wfw | AAAATAAATTTCTGGCCAACTT      |
| YPR140wrv | CGGCTAATCTGCTTCTTAAAT       |
